# Supplementary material
Source: PubMed Central journal article supplement (PMC7588044)
Supplement: ci9b00864_si_001.pdf [file ci9b00864_si_001.pdf]

## Supporting Information

# Improved consensus-fragment selection in template-assisted prediction of protein structures with the UNRES force field in CASP13

Agnieszka S. Karczyńska,<sup>†</sup> Karolina Zięba,<sup>†</sup> Urszula Uciechowska,<sup>†</sup> Magdalena A. Mozolewska,<sup>‡</sup> Paweł Krupa,<sup>¶</sup> Emilia A. Lubecka,<sup>§</sup> Agnieszka G. Lipska,<sup>†</sup> Celina Sikorska,<sup>†</sup> Sergey A. Samsonov,<sup>†</sup> Adam K. Sieradzan,<sup>†,||</sup> Artur Giełdoń,<sup>†</sup> Adam Liwo,<sup>†,||</sup> Rafał Ślusarz,<sup>†</sup> Magdalena Ślusarz,<sup>†</sup> Jooyoung Lee,<sup>||</sup> Keehyoung Joo,<sup>⊥</sup> and Cezary Czaplewski<sup>\*,†</sup>

<sup>†</sup>*Faculty of Chemistry, University of Gdańsk, Wita Stwosza 63, 80-308 Gdańsk, Poland*

<sup>‡</sup>*Institute of Computer Science, Polish Academy of Sciences, ul. Jana Kazimierza 5, Warsaw, PL-02668, Poland*

<sup>¶</sup>*Institute of Physics, Polish Academy of Sciences, Aleja Lotników 32/46, Warsaw, PL-02668, Poland*

<sup>§</sup>*Institute of Informatics, Faculty of Mathematics, Physics, and Informatics, University of Gdańsk, Wita Stwosza 57, 80-308 Gdańsk, Poland*

<sup>||</sup>*School of Computational Sciences, Korea Institute for Advanced Study, 85 Hoegiro, Dongdaemun-gu, Seoul 130-722, Republic of Korea*

<sup>⊥</sup>*Center for Advanced Computation, Korea Institute for Advanced Study, 85 Hoegiro, Dongdaemun-gu, Seoul 130-722, Republic of Korea*

E-mail: [cezary.czaplewski@ug.edu.pl](mailto:cezary.czaplewski@ug.edu.pl)

Phone: +48585235126. Fax: +48585235012

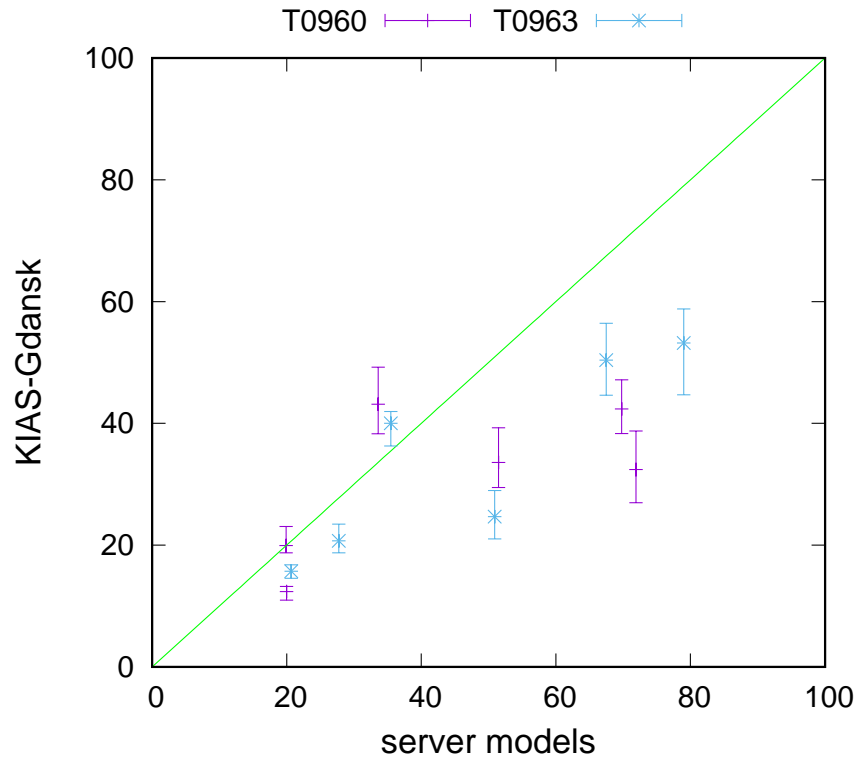

Figure S1: A whiskered scatter plot of the GDT\_TS of initial models vs. KIAS-Gdansk predictions of the T0960 and T0963 targets.

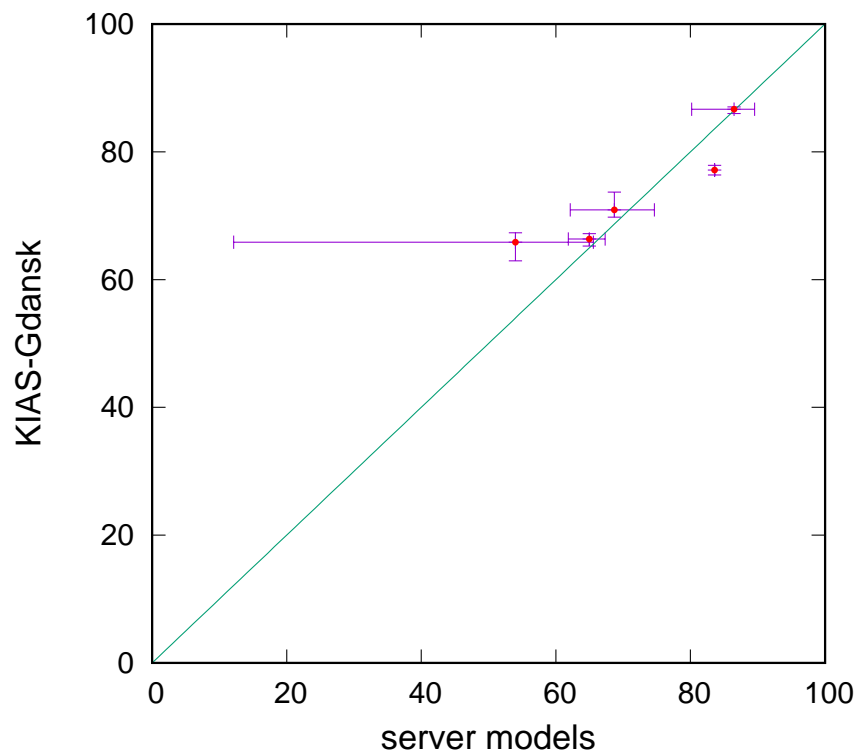

Figure S2: A whiskered scatter plot of the GDT\_TS of the models from the selected servers vs. that of the KIAS-Gdansk predictions for the large-size regular targets (T0984, T0995, T1003 and T1009), for which the server models selected based on DeepQA score<sup>25</sup> were used as initial models.

Table S1: GDT\_TS values and rankings of the KIAS-Gdansk first and the best (highest GDT\_TS) models of the CASP13 regular targets.

| EU <sup>a</sup> | #res <sup>b</sup> | type <sup>c</sup> | Model 1 |                   | best model          |        |                   |
|-----------------|-------------------|-------------------|---------|-------------------|---------------------|--------|-------------------|
|                 |                   |                   | GDT_TS  | rank <sup>d</sup> | model# <sup>e</sup> | GDT_TS | rank <sup>d</sup> |
| T0949-D1        | 139               | TBM/FM            | 61.24   | 69/395            | 5                   | 62.79  | 30/395            |
| T0953s1-D1      | 67                | FM                | 47.76   | 16/419            | 5                   | 49.63  | 9/419             |
| T0953s2-D1      | 44                | FM/TBM            | 28.41   | 357/412           | 4                   | 30.68  | 311/412           |
| T0953s2-D23     | 204               | other             | 30.39   | 98/412            | 5                   | 32.23  | 73/412            |
| T0953s2-D2      | 111               | FM                | 48.23   | 78/412            | 5                   | 50.39  | 69/412            |
| T0953s2-D3      | 93                | FM                | 20.45   | 215/410           | 1                   | 20.45  | 215/410           |
| T0953s2         | 249               | other             | 25.61   | 88/412            | 5                   | 26.91  | 70/412            |
| T0954-D1        | 336               | TBM-hard          | 52.23   | 220/390           | 5                   | 53.94  | 193/390           |
| T0955-D1        | 41                | FM/TBM            | 92.68   | 19/413            | 4                   | 93.29  | 15/413            |
| T0957s1-D1      | 108               | FM                | 40.74   | 98/435            | 4                   | 41.44  | 94/435            |
| T0957s1-D2      | 54                | TBM-hard          | 56.02   | 87/435            | 1                   | 56.02  | 87/435            |
| T0957s1         | 163               | other             | 27.32   | 151/435           | 2                   | 29.32  | 96/435            |
| T0957s2-D1      | 155               | FM                | 45.81   | 94/431            | 1                   | 45.81  | 94/431            |
| T0958-D1        | 77                | FM/TBM            | 61.36   | 103/420           | 3                   | 61.69  | 97/420            |
| T0959-D1        | 180               | TBM-hard          | 59.31   | 103/392           | 5                   | 60.56  | 80/392            |
| T0960-D1        | 32                | other             | 42.19   | 99/391            | 3                   | 49.22  | 12/391            |
| T0960-D2        | 84                | FM                | 39.29   | 68/395            | 1                   | 39.29  | 68/395            |
| T0960-D3        | 89                | TBM-hard          | 38.76   | 209/397           | 1                   | 38.76  | 209/397           |
| T0960-D4        | 64                | other             | 18.75   | 306/395           | 5                   | 23.05  | 164/395           |
| T0960-D5        | 105               | TBM-easy          | 45.00   | 232/395           | 3                   | 47.14  | 229/395           |
| T0960           | 384               | other             | 13.17   | 249/399           | 3                   | 13.23  | 247/399           |
| T0961-D1        | 503               | TBM-easy          | 88.97   | 50/402            | 1                   | 88.97  | 50/402            |
| T0963-D1        | 31                | other             | 41.13   | 102/382           | 4                   | 41.94  | 69/382            |
| T0963-D2        | 82                | FM                | 21.04   | 266/383           | 3                   | 28.96  | 157/383           |
| T0963-D3        | 93                | TBM-hard          | 44.62   | 182/387           | 3                   | 56.45  | 107/387           |
| T0963-D4        | 64                | other             | 19.53   | 285/382           | 2                   | 23.44  | 129/382           |
| T0963-D5        | 94                | TBM-easy          | 55.59   | 204/392           | 3                   | 58.78  | 189/392           |
| T0963           | 372               | other             | 16.35   | 206/392           | 3                   | 16.76  | 198/392           |
| T0964-D1        | 95                | TBM-hard          | 70.79   | 73/401            | 4                   | 71.58  | 68/401            |
| T0965-D1        | 313               | TBM-hard          | 63.98   | 106/411           | 2                   | 65.02  | 50/411            |
| T0966-D1        | 492               | TBM-hard          | 53.40   | 210/403           | 1                   | 53.40  | 210/403           |

|            |     |          |       |         |   |       |         |
|------------|-----|----------|-------|---------|---|-------|---------|
| T0968s1-D1 | 119 | FM       | 55.09 | 113/443 | 3 | 55.93 | 109/443 |
| T0968s2-D1 | 116 | FM       | 64.78 | 39/452  | 1 | 64.78 | 39/452  |
| T0969-D1   | 354 | FM       | 46.40 | 75/389  | 2 | 48.87 | 46/389  |
| T0970-D1   | 97  | FM/TBM   | 45.29 | 96/451  | 5 | 45.59 | 95/451  |
| T0973-D1   | 128 | TBM-easy | 52.15 | 214/440 | 4 | 57.42 | 156/440 |
| T0974s1-D1 | 69  | TBM-easy | 76.81 | 170/444 | 5 | 78.62 | 114/444 |
| T0975-D1   | 293 | FM       | 34.79 | 152/394 | 2 | 40.75 | 81/394  |
| T0976-D1   | 120 | TBM-easy | 79.17 | 62/407  | 2 | 79.79 | 56/407  |
| T0976-D2   | 124 | TBM-easy | 72.38 | 164/408 | 4 | 77.62 | 80/408  |
| T0976      | 252 | other    | 42.30 | 133/410 | 2 | 42.90 | 125/410 |
| T0977-D1   | 301 | TBM-easy | 74.83 | 144/404 | 4 | 75.17 | 129/404 |
| T0977-D2   | 204 | TBM-easy | 63.85 | 205/404 | 1 | 63.85 | 205/404 |
| T0977      | 566 | other    | 41.77 | 193/404 | 5 | 43.65 | 109/404 |
| T0979-D1   | 92  | TBM-hard | 49.46 | 72/453  | 2 | 58.97 | 21/453  |
| T0980s1-D1 | 105 | FM       | 27.16 | 252/449 | 5 | 43.03 | 34/449  |
| T0980s2-D1 | 31  | other    | 31.45 | 353/452 | 2 | 33.87 | 153/452 |
| T0981-D1   | 86  | TBM-hard | 54.94 | 80/387  | 1 | 54.94 | 80/387  |
| T0981-D2   | 80  | FM       | 28.44 | 71/387  | 4 | 33.12 | 12/387  |
| T0981-D3   | 203 | FM/TBM   | 46.55 | 74/387  | 2 | 50.12 | 33/387  |
| T0981-D4   | 111 | TBM-hard | 58.56 | 83/394  | 5 | 61.26 | 27/394  |
| T0981-D5   | 127 | TBM-hard | 47.05 | 88/394  | 5 | 51.38 | 58/394  |
| T0981      | 640 | other    | 17.05 | 87/399  | 5 | 18.29 | 43/399  |
| T0983-D1   | 236 | TBM-easy | 87.71 | 127/419 | 3 | 88.14 | 106/419 |
| T0984-D1   | 504 | TBM-easy | 67.32 | 1/393   | 1 | 67.32 | 1/393   |
| T0984-D2   | 147 | TBM-easy | 70.34 | 73/393  | 3 | 73.69 | 32/393  |
| T0985-D1   | 842 | TBM-hard | 55.11 | 29/382  | 4 | 55.28 | 27/382  |
| T0986s1-D1 | 92  | FM/TBM   | 64.13 | 62/443  | 2 | 69.29 | 14/443  |
| T0986s2-D1 | 155 | FM       | 41.29 | 56/425  | 4 | 41.77 | 55/425  |
| T0987-D1   | 185 | FM       | 49.59 | 14/394  | 1 | 49.59 | 14/394  |
| T0987-D2   | 207 | FM       | 41.07 | 20/394  | 5 | 41.20 | 19/394  |
| T0987      | 405 | other    | 24.80 | 14/394  | 1 | 24.80 | 14/394  |
| T0989-D1   | 134 | FM       | 45.90 | 37/418  | 2 | 49.63 | 10/418  |
| T0989-D2   | 112 | FM       | 34.38 | 23/418  | 2 | 35.94 | 12/418  |
| T0989      | 246 | other    | 25.71 | 52/418  | 2 | 27.74 | 11/418  |
| T0990-D1   | 76  | FM       | 65.79 | 22/396  | 4 | 67.11 | 11/396  |
| T0990-D2   | 231 | FM       | 14.50 | 275/397 | 4 | 21.54 | 67/397  |

|            |     |          |       |         |   |       |         |
|------------|-----|----------|-------|---------|---|-------|---------|
| T0990-D3   | 213 | FM       | 15.38 | 123/397 | 4 | 17.14 | 53/397  |
| T0990      | 552 | other    | 9.24  | 95/397  | 4 | 10.14 | 65/397  |
| T0991-D1   | 111 | FM       | 23.65 | 152/447 | 3 | 26.80 | 75/447  |
| T0992-D1   | 107 | FM/TBM   | 69.86 | 82/431  | 4 | 71.50 | 52/431  |
| T0993s1-D1 | 263 | TBM-easy | 72.15 | 130/417 | 2 | 72.24 | 125/417 |
| T0993s2-D1 | 98  | TMB-easy | 68.11 | 179/444 | 3 | 68.37 | 176/444 |
| T0995-D1   | 294 | TBM-easy | 76.45 | 206/416 | 3 | 77.89 | 192/416 |
| T0996-D1   | 107 | TBM-easy | 79.21 | 2/390   | 1 | 79.21 | 2/390   |
| T0996-D2   | 127 | TBM-easy | 78.35 | 67/390  | 1 | 78.35 | 67/390  |
| T0996-D3   | 100 | TBM-easy | 54.25 | 159/388 | 5 | 66.50 | 100/388 |
| T0996-D4   | 133 | TBM-easy | 60.90 | 125/388 | 2 | 68.80 | 79/388  |
| T0996-D5   | 121 | TBM-easy | 65.08 | 142/385 | 1 | 65.08 | 142/385 |
| T0996-D6   | 104 | TBM-easy | 39.18 | 205/385 | 3 | 52.16 | 189/385 |
| T0996-D7   | 140 | TBM-easy | 70.36 | 46/385  | 1 | 70.36 | 46/385  |
| T0996      | 848 | other    | 18.03 | 150/390 | 3 | 19.20 | 78/390  |
| T0997-D1   | 185 | FM/TBM   | 46.35 | 190/440 | 2 | 46.62 | 188/440 |
| T0998-D1   | 166 | FM       | 17.02 | 116/436 | 2 | 17.77 | 82/436  |
| T1000-D1   | 83  | other    | 93.67 | 198/399 | 5 | 95.78 | 120/399 |
| T1000-D2   | 431 | FM       | 57.06 | 141/401 | 4 | 59.17 | 31/401  |
| T1000      | 514 | other    | 46.56 | 140/401 | 4 | 48.28 | 35/401  |
| T1001-D1   | 139 | FM       | 66.73 | 89/442  | 1 | 66.73 | 89/442  |
| T1002-D1   | 59  | TBM-easy | 59.32 | 239/405 | 4 | 64.41 | 227/405 |
| T1002-D2   | 59  | TBM-easy | 38.56 | 248/405 | 1 | 38.56 | 248/405 |
| T1002-D3   | 144 | TBM-easy | 71.88 | 168/405 | 4 | 76.04 | 130/405 |
| T1002      | 270 | other    | 38.33 | 173/405 | 4 | 41.02 | 120/405 |
| T1003-D1   | 437 | TBM-easy | 87.04 | 82/417  | 1 | 87.04 | 82/417  |
| T1004-D1   | 86  | TBM-easy | 79.07 | 153/402 | 1 | 79.07 | 153/402 |
| T1004-D2   | 77  | TBM-easy | 72.73 | 46/402  | 3 | 75.00 | 30/402  |
| T1004-D3   | 230 | other    | 84.46 | 147/396 | 3 | 88.48 | 97/396  |
| T1004      | 458 | other    | 48.87 | 148/403 | 3 | 51.26 | 104/403 |
| T1005-D1   | 326 | FM/TBM   | 51.23 | 80/397  | 5 | 51.69 | 72/397  |
| T1006-D1   | 77  | TBM-easy | 97.40 | 57/453  | 2 | 97.73 | 43/453  |
| T1008-D1   | 77  | FM/TBM   | 83.12 | 20/440  | 4 | 84.09 | 14/440  |
| T1009-D1   | 718 | TMB-hard | 66.99 | 58/408  | 4 | 67.20 | 38/408  |
| T1010-D1   | 210 | FM       | 32.74 | 57/429  | 2 | 34.76 | 41/429  |
| T1011-D1   | 302 | TBM-hard | 65.89 | 29/390  | 5 | 67.50 | 13/390  |

|            |     |          |       |         |   |       |         |
|------------|-----|----------|-------|---------|---|-------|---------|
| T1011-D2   | 160 | other    | 84.06 | 154/390 | 5 | 87.19 | 111/390 |
| T1011      | 534 | other    | 45.21 | 42/390  | 1 | 45.21 | 42/390  |
| T1013-D1   | 288 | TBM-easy | 77.34 | 123/388 | 4 | 79.51 | 96/388  |
| T1014-D1   | 159 | TBM-easy | 82.12 | 156/404 | 4 | 86.26 | 10/404  |
| T1014-D2   | 117 | TBM-easy | 70.94 | 117/398 | 3 | 74.57 | 29/398  |
| T1014      | 276 | other    | 46.27 | 155/405 | 4 | 48.60 | 10/405  |
| T1015s1-D1 | 88  | FM       | 35.80 | 123/464 | 2 | 48.86 | 49/464  |
| T1015s2-D1 | 129 | TBM-hard | 48.06 | 292/436 | 5 | 69.96 | 16/436  |
| T1016-D1   | 202 | TBM-easy | 81.06 | 31/439  | 5 | 81.68 | 11/439  |
| T1017s1-D1 | 110 | TBM-easy | 64.09 | 240/441 | 5 | 68.86 | 211/441 |
| T1017s2-D1 | 128 | FM       | 53.80 | 104/438 | 3 | 55.40 | 90/438  |
| T1018-D1   | 324 | TBM-easy | 85.70 | 59/421  | 1 | 85.70 | 59/421  |
| T1019s1-D1 | 58  | FM/TBM   | 50.00 | 146/445 | 4 | 53.02 | 128/445 |
| T1019s2-D1 | 88  | TBM-easy | 53.12 | 273/436 | 1 | 53.12 | 273/436 |
| T1020-D1   | 322 | TBM-easy | 69.97 | 51/410  | 2 | 70.85 | 36/410  |
| T1021s1-D1 | 149 | TBM-hard | 70.47 | 17/422  | 2 | 70.64 | 16/422  |
| T1021s2-D1 | 349 | TBM-hard | 65.04 | 74/406  | 2 | 65.62 | 61/406  |
| T1021s3-D1 | 178 | FM       | 51.05 | 75/413  | 3 | 52.26 | 54/413  |
| T1021s3-D2 | 101 | FM       | 51.03 | 65/411  | 1 | 51.03 | 65/411  |
| T1021s3    | 295 | other    | 30.71 | 74/413  | 3 | 31.43 | 64/413  |
| T1022s1-D1 | 156 | FM       | 48.72 | 80/423  | 4 | 51.12 | 65/423  |
| T1022s1-D2 | 67  | TBM-hard | 62.31 | 157/422 | 4 | 63.43 | 135/422 |
| T1022s1    | 229 | other    | 35.31 | 79/428  | 4 | 36.21 | 67/428  |
| T1022s2-D1 | 525 | TBM-hard | 46.63 | 154/404 | 1 | 46.63 | 154/404 |

<sup>a</sup>Evaluation unit. <sup>b</sup>Number of residues. <sup>c</sup>Target type; TMB: Template Based Modeling, FM: Free Modeling. <sup>d</sup>CASP13 rank/total number of models submitted for the respective target. <sup>e</sup>The numbers of the best of KIAS-Gdansk models.

Table S2: Numbers of EUs and their minimum, maximum, and average GDT\_TS values, as well as the standard deviations of the GDT\_TS for the respective target categories for the KIAS-Gdansk, selected server and all server first, all and best models obtained in the CASP12 and CASP13 experiments.

| Type                    | #EU <sup>a</sup> | GDT_TS, first models |                  |                  |                  | #EU <sup>a</sup> | GDT_TS, all models |                  |                  |                  | #EU <sup>a</sup> | GDT_TS, best models |                  |                  |                  |
|-------------------------|------------------|----------------------|------------------|------------------|------------------|------------------|--------------------|------------------|------------------|------------------|------------------|---------------------|------------------|------------------|------------------|
|                         |                  | min <sup>b</sup>     | max <sup>c</sup> | ave <sup>d</sup> | std <sup>e</sup> |                  | min <sup>b</sup>   | max <sup>c</sup> | ave <sup>d</sup> | std <sup>e</sup> |                  | min <sup>b</sup>    | max <sup>c</sup> | ave <sup>d</sup> | std <sup>e</sup> |
| CASP12 KIAS-Gdansk      |                  |                      |                  |                  |                  |                  |                    |                  |                  |                  |                  |                     |                  |                  |                  |
| TBM                     | 12               | 32.25                | 87.03            | 62.51            | 15.13            | 60               | 19.60              | 87.66            | 62.03            | 14.76            | 12               | 50.35               | 87.66            | 65.95            | 11.29            |
| FM/TBM                  | 17               | 16.81                | 82.25            | 47.97            | 19.40            | 85               | 16.81              | 82.25            | 47.82            | 18.51            | 17               | 17.24               | 82.25            | 50.21            | 18.34            |
| FM                      | 38               | 9.46                 | 71.15            | 29.88            | 13.50            | 190              | 8.14               | 71.64            | 29.62            | 13.30            | 38               | 9.82                | 71.64            | 32.47            | 13.73            |
| other                   | 18               | 8.68                 | 53.67            | 24.66            | 11.70            | 90               | 7.65               | 54.52            | 25.36            | 12.13            | 18               | 8.68                | 54.52            | 27.90            | 13.52            |
| CASP12 selected servers |                  |                      |                  |                  |                  |                  |                    |                  |                  |                  |                  |                     |                  |                  |                  |
| TBM                     | 48               | 34.10                | 87.66            | 65.86            | 9.88             | 240              | 19.22              | 90.82            | 61.31            | 13.77            | 48               | 35.12               | 90.82            | 67.20            | 9.99             |
| FM/TBM                  | 68               | 20.35                | 80.17            | 51.32            | 13.80            | 340              | 12.07              | 81.16            | 47.32            | 13.50            | 68               | 20.64               | 81.16            | 56.09            | 12.04            |
| FM                      | 150              | 7.77                 | 77.16            | 30.61            | 12.87            | 750              | 6.96               | 79.57            | 29.23            | 11.91            | 150              | 9.16                | 79.57            | 35.09            | 13.25            |
| other                   | 71               | 7.52                 | 50.87            | 26.97            | 11.89            | 355              | 5.84               | 52.33            | 25.26            | 11.08            | 71               | 8.16                | 52.33            | 29.27            | 12.27            |
| CASP12 all servers      |                  |                      |                  |                  |                  |                  |                    |                  |                  |                  |                  |                     |                  |                  |                  |
| TBM                     | 471              | 5.13                 | 87.66            | 49.86            | 20.19            | 2056             | 4.53               | 90.82            | 45.94            | 20.65            | 474              | 5.43                | 90.82            | 52.27            | 19.19            |
| FM/TBM                  | 668              | 6.08                 | 80.17            | 36.83            | 15.25            | 2924             | 4.96               | 81.16            | 34.88            | 14.95            | 670              | 6.16                | 81.16            | 40.03            | 15.19            |
| FM                      | 1448             | 3.79                 | 77.16            | 23.16            | 11.16            | 6330             | 2.88               | 79.57            | 22.50            | 10.65            | 1458             | 3.93                | 79.57            | 25.26            | 11.88            |
| other                   | 697              | 0.79                 | 50.87            | 19.48            | 11.23            | 3047             | 0.79               | 52.33            | 18.56            | 10.64            | 702              | 2.53                | 52.33            | 21.01            | 11.39            |



| Type                    | #EU <sup>a</sup> | GDT_TS, first models |                  |                  |                  | #EU <sup>a</sup> | GDT_TS, all models |                  |                  |                  | #EU <sup>a</sup> | GDT_TS, best models |                  |                  |                  |
|-------------------------|------------------|----------------------|------------------|------------------|------------------|------------------|--------------------|------------------|------------------|------------------|------------------|---------------------|------------------|------------------|------------------|
|                         |                  | min <sup>b</sup>     | max <sup>c</sup> | ave <sup>d</sup> | std <sup>e</sup> |                  | min <sup>b</sup>   | max <sup>c</sup> | ave <sup>d</sup> | std <sup>e</sup> |                  | min <sup>b</sup>    | max <sup>c</sup> | ave <sup>d</sup> | std <sup>e</sup> |
| CASP13 KIAS-Gdansk      |                  |                      |                  |                  |                  |                  |                    |                  |                  |                  |                  |                     |                  |                  |                  |
| TBM                     | 57               | 38.56                | 97.40            | 65.23            | 13.75            | 285              | 21.61              | 97.73            | 64.53            | 14.91            | 57               | 38.56               | 97.73            | 67.76            | 12.67            |
| FM/TBM                  | 11               | 28.41                | 92.68            | 59.44            | 18.14            | 55               | 25.57              | 93.29            | 56.78            | 17.59            | 11               | 30.68               | 93.29            | 61.25            | 17.84            |
| FM                      | 31               | 14.50                | 66.73            | 40.82            | 14.78            | 155              | 14.50              | 67.11            | 40.70            | 14.24            | 31               | 17.14               | 67.11            | 43.56            | 13.72            |
| other                   | 27               | 9.24                 | 93.67            | 36.97            | 21.43            | 135              | 9.24               | 95.78            | 37.18            | 21.25            | 27               | 10.14               | 95.78            | 38.89            | 21.95            |
| CASP13 selected servers |                  |                      |                  |                  |                  |                  |                    |                  |                  |                  |                  |                     |                  |                  |                  |
| TBM                     | 276              | 20.36                | 99.03            | 68.01            | 12.95            | 987              | 12.11              | 99.03            | 66.63            | 14.43            | 344              | 15.16               | 99.03            | 69.38            | 13.38            |
| FM/TBM                  | 47               | 32.65                | 92.68            | 58.64            | 15.88            | 186              | 29.41              | 95.12            | 55.75            | 14.86            | 56               | 29.41               | 95.12            | 59.87            | 17.10            |
| FM                      | 140              | 7.20                 | 73.02            | 38.99            | 13.82            | 510              | 7.20               | 73.20            | 37.14            | 13.18            | 167              | 7.20                | 73.20            | 38.90            | 14.45            |
| other                   | 101              | 5.82                 | 96.72            | 39.72            | 24.17            | 394              | 5.82               | 97.29            | 40.20            | 24.27            | 119              | 5.82                | 97.29            | 38.25            | 23.60            |
| CASP13 all servers      |                  |                      |                  |                  |                  |                  |                    |                  |                  |                  |                  |                     |                  |                  |                  |
| TBM                     | 2271             | 2.35                 | 99.03            | 50.46            | 24.86            | 10917            | 2.10               | 99.03            | 47.60            | 24.81            | 2125             | 3.15                | 99.03            | 53.93            | 24.37            |
| FM/TBM                  | 395              | 5.06                 | 92.68            | 42.33            | 17.73            | 1931             | 4.53               | 95.12            | 40.38            | 17.02            | 395              | 6.77                | 95.12            | 45.65            | 17.76            |
| FM                      | 1202             | 3.60                 | 73.02            | 24.82            | 12.48            | 5920             | 3.60               | 73.20            | 23.93            | 11.83            | 1130             | 6.14                | 73.20            | 27.41            | 13.13            |
| other                   | 1204             | 2.10                 | 99.53            | 26.89            | 19.85            | 5855             | 1.92               | 99.53            | 25.77            | 19.53            | 986              | 2.10                | 99.53            | 29.52            | 21.79            |

<sup>a</sup>Number of models of the evaluation units of a given type, pool (first, all or best), from a given source and from a given CASP experiment. <sup>b</sup>Minimum over all models specified in point a. <sup>c</sup>Maximum over all models specified in point a. <sup>d</sup>Average over all models specified in point a. <sup>e</sup>Standard deviation over all models specified in point a.

Table S3: The differences of the mean GDT\_TS values corresponding to the CASP12 and CASP13 experiments, for the respective target categories for the KIAS-Gdansk, selected server and all server models (first, all, and best), the standard deviations of these differences, and their statistical significances.

| Type                   |            |                     |           | KIAS-Gdansk models |                     |           |            |                     |           |
|------------------------|------------|---------------------|-----------|--------------------|---------------------|-----------|------------|---------------------|-----------|
|                        | $\Delta^a$ | $\sigma_{\Delta}^b$ | $P(\%)^c$ | $\Delta^a$         | $\sigma_{\Delta}^b$ | $P(\%)^c$ | $\Delta^a$ | $\sigma_{\Delta}^b$ | $P(\%)^c$ |
| KIAS-Gdansk models     |            |                     |           |                    |                     |           |            |                     |           |
| TBM                    | 2.72       | 4.44                | 92        | 2.50               | 2.11                | 100       | 1.81       | 3.96                | 89        |
| FM/TBM                 | 11.47      | 7.32                | 97        | 8.96               | 3.14                | 100       | 11.04      | 7.02                | 97        |
| FM                     | 10.94      | 3.41                | 100       | 11.08              | 1.49                | 100       | 11.09      | 3.32                | 100       |
| other                  | 12.31      | 5.54                | 100       | 11.82              | 2.47                | 100       | 10.99      | 5.80                | 100       |
| selected server models |            |                     |           |                    |                     |           |            |                     |           |
| TBM                    | 2.15       | 1.96                | 100       | 5.32               | 1.03                | 100       | 2.18       | 2.01                | 100       |
| FM/TBM                 | 7.32       | 2.79                | 100       | 8.43               | 1.28                | 100       | 3.78       | 2.62                | 100       |
| FM                     | 8.38       | 1.57                | 100       | 7.91               | 0.71                | 100       | 3.81       | 1.56                | 100       |
| other                  | 12.75      | 3.10                | 100       | 14.94              | 1.40                | 100       | 8.98       | 3.02                | 100       |
| all server models      |            |                     |           |                    |                     |           |            |                     |           |
| TBM                    | 0.60       | 1.22                | 92        | 1.66               | 0.58                | 100       | 1.66       | 1.19                | 100       |
| FM/TBM                 | 5.50       | 1.03                | 100       | 5.50               | 0.46                | 100       | 5.62       | 1.03                | 100       |
| FM                     | 1.66       | 0.46                | 100       | 1.43               | 0.20                | 100       | 2.15       | 0.49                | 100       |
| other                  | 7.41       | 0.82                | 100       | 7.21               | 0.38                | 100       | 8.51       | 0.90                | 100       |

<sup>a</sup> $\Delta = \text{GDT\_TS}(\text{CASP13}) - \text{GDT\_TS}(\text{CASP12})$ . <sup>b</sup>Standard deviation of  $\Delta$ . <sup>c</sup>Statistical significance of  $\Delta$  assessed by means of the Student's test.

Table S4: Differences of the mean GDT\_TS values along, with their standard deviations and statistical significances, corresponding to the the KIAS-Gdansk models and selected server models, the KIAS-Gdansk models and all server models, and selected server models and all server models (first, all and best).

| Type                                          | first models |                     |           | all models |                     |           | best models |                     |           |
|-----------------------------------------------|--------------|---------------------|-----------|------------|---------------------|-----------|-------------|---------------------|-----------|
|                                               | $\Delta^a$   | $\sigma_{\Delta}^b$ | $P(\%)^c$ | $\Delta^a$ | $\sigma_{\Delta}^b$ | $P(\%)^c$ | $\Delta^a$  | $\sigma_{\Delta}^b$ | $P(\%)^c$ |
| CASP12                                        |              |                     |           |            |                     |           |             |                     |           |
| KIAS-Gdansk models and selected server models |              |                     |           |            |                     |           |             |                     |           |
| TBM                                           | -3.35        | 3.57                | 94        | 0.72       | 2.02                | 78        | -1.25       | 3.31                | 78        |
| FM/TBM                                        | -3.35        | 4.08                | 92        | 0.50       | 1.77                | 69        | -5.88       | 3.66                | 100       |
| FM                                            | -0.73        | 2.36                | 75        | 0.39       | 0.99                | 79        | -2.62       | 2.42                | 99        |
| other                                         | -2.31        | 3.13                | 95        | 0.10       | 1.33                | 56        | -1.37       | 3.31                | 81        |
| KIAS-Gdansk models and all server models      |              |                     |           |            |                     |           |             |                     |           |
| TBM                                           | 12.65        | 5.87                | 100       | 16.09      | 2.69                | 100       | 13.68       | 5.57                | 100       |
| FM/TBM                                        | 11.14        | 3.77                | 100       | 12.94      | 1.66                | 100       | 10.18       | 3.75                | 100       |
| FM                                            | 6.72         | 1.84                | 100       | 7.12       | 0.79                | 100       | 7.21        | 1.96                | 100       |
| other                                         | 5.18         | 2.68                | 100       | 6.80       | 1.14                | 100       | 6.89        | 2.73                | 100       |
| selected server models and all server models  |              |                     |           |            |                     |           |             |                     |           |
| TBM                                           | 16.00        | 2.95                | 100       | 15.37      | 1.37                | 100       | 14.93       | 2.81                | 100       |
| FM/TBM                                        | 14.49        | 1.93                | 100       | 12.44      | 0.85                | 100       | 16.06       | 1.90                | 100       |
| FM                                            | 7.45         | 0.97                | 100       | 6.73       | 0.42                | 100       | 9.83        | 1.03                | 100       |
| other                                         | 7.49         | 1.41                | 100       | 6.70       | 0.60                | 100       | 8.26        | 1.43                | 100       |
| CASP13                                        |              |                     |           |            |                     |           |             |                     |           |
| KIAS-Gdansk models and selected server models |              |                     |           |            |                     |           |             |                     |           |
| TBM                                           | -2.78        | 1.90                | 100       | -2.10      | 0.98                | 100       | -1.62       | 1.90                | 99        |
| FM/TBM                                        | 0.80         | 5.46                | 62        | 1.03       | 2.38                | 79        | 1.38        | 5.68                | 72        |
| FM                                            | 1.83         | 2.78                | 93        | 3.56       | 1.23                | 100       | 4.66        | 2.80                | 100       |
| other                                         | -2.75        | 5.12                | 90        | -3.02      | 2.35                | 100       | 0.64        | 4.97                | 63        |
| KIAS-Gdansk models and all server models      |              |                     |           |            |                     |           |             |                     |           |
| TBM                                           | 14.77        | 3.31                | 100       | 16.93      | 1.48                | 100       | 13.83       | 3.24                | 100       |
| FM/TBM                                        | 17.11        | 5.42                | 100       | 16.40      | 2.33                | 100       | 15.60       | 5.43                | 100       |
| FM                                            | 16.00        | 2.28                | 100       | 16.77      | 0.97                | 100       | 16.15       | 2.39                | 100       |
| other                                         | 10.08        | 3.87                | 100       | 11.41      | 1.70                | 100       | 9.37        | 4.25                | 100       |
| selected server models and all server models  |              |                     |           |            |                     |           |             |                     |           |
| TBM                                           | 17.55        | 1.52                | 100       | 19.03      | 0.80                | 100       | 15.45       | 1.35                | 100       |
| FM/TBM                                        | 16.31        | 2.71                | 100       | 15.37      | 1.29                | 100       | 14.22       | 2.52                | 100       |
| FM                                            | 14.17        | 1.13                | 100       | 13.21      | 0.55                | 100       | 11.49       | 1.10                | 100       |
| other                                         | 12.83        | 2.09                | 100       | 14.43      | 1.03                | 100       | 8.73        | 2.13                | 100       |

<sup>a</sup> $\Delta = \text{GDT\_TS}(\text{CASP13}) - \text{GDT\_TS}(\text{CASP12})$ . <sup>b</sup>Standard deviation of  $\Delta$ . <sup>c</sup>Statistical significance of  $\Delta$  assessed by means of the Student's test.

Table S5: Difficulties, measures of the fit to the experimental structures and rankings of the KIAS-Gdansk first and the best (highest GDT\_TS) models of the CASP13 oligomeric targets.

| Target | Composition <sup>a</sup> | Difficulty <sup>b</sup> | Model 1         |                 |                     |                   | best model         |                 |                 |                     |                   |
|--------|--------------------------|-------------------------|-----------------|-----------------|---------------------|-------------------|--------------------|-----------------|-----------------|---------------------|-------------------|
|        |                          |                         | F1 <sup>c</sup> | JC <sup>d</sup> | I-RMSD <sup>e</sup> | Rank <sup>h</sup> | Model <sup>f</sup> | F1 <sup>c</sup> | JC <sup>d</sup> | I-RMSD <sup>e</sup> | Rank <sup>f</sup> |
| H0953  | 3 × 72 + 249             | Hard                    | 2.6             | 0.27            | 15.19               | 27/62             | 4                  | 5.5             | 0.26            | 13.43               | 22/62             |
| H0957  | 163 + 164                | Hard                    | 0.0             | 0.07            | 21.55               | 47/61             | 5                  | 0.0             | 0.29            | 16.55               | 19/61             |
| H0968  | 2 × 126 + 2 × 116        | Hard                    | 2.4             | 0.25            | 10.42               | 10/63             | 4                  | 5.3             | 0.30            | 1.33                | 1/63              |
| H0974  | 72 + 95                  | Easy                    | 0.0             | 0.11            | 9.43                | 117/177           | 4                  | 16.2            | 0.33            | 10.69               | 55/177            |
| H0980  | 2 × 111 + 2 × 52         | Hard                    | 0.0             | 0.13            | 11.25               | 52/73             | 4                  | 3.0             | 0.20            | 7.04                | 4/73              |
| H0986  | 96 + 155                 | Hard                    | 1.5             | 0.09            | 21.57               | 13/77             | 3                  | 2.9             | 0.35            | 18.45               | 7/77              |
| H0993  | 2 × 269 + 2 × 109        | Medium                  | 9.0             | 0.24            | 13.36               | 14/148            | 5                  | 10.8            | 0.24            | 11.97               | 10/148            |
| H1015  | 89 + 129                 | Hard                    | 0.0             | 0.17            | 15.52               | 154/158           | 3                  | 7.4             | 0.21            | 13.76               | 10/158            |
| H1017  | 111 + 129                | Medium                  | 5.4             | 0.25            | 15.30               | 19/159            | 1                  | 5.4             | 0.25            | 15.30               | 19/159            |
| H1019  | 58 + 88                  | Hard                    | 8.8             | 0.26            | 11.54               | 41/161            | 1                  | 8.8             | 0.26            | 11.54               | 41/161            |
| T0961o | 4 × 505                  | Easy                    | 62.9            | 0.65            | 1.09                | 33/151            | 1                  | 62.9            | 0.65            | 1.09                | 33/151            |
| T0965o | 2 × 334                  | Medium                  | 0.0             | 0.09            | 21.46               | 133/152           | 2                  | 0.0             | 0.18            | 15.24               | 131/152           |
| T0966o | 2 × 494                  | Medium                  | 0.0             | 0.00            | 26.68               | 67/155            | 5                  | 0.0             | 0.00            | 36.76               | 34/155            |
| T0973o | 2 × 146                  | Easy                    | 10.9            | 0.70            | 7.58                | 107/162           | 1                  | 10.9            | 0.70            | 7.58                | 107/162           |
| T0976o | 2 × 252                  | Medium                  | 0.7             | 0.16            | 19.28               | 45/162            | 5                  | 2.7             | 0.20            | 20.61               | 32/162            |
| T0983o | 2 × 245                  | Easy                    | 86.1            | 0.77            | 0.87                | 23/158            | 1                  | 86.1            | 0.77            | 0.87                | 23/158            |
| T0984o | 2 × 752                  | Easy                    | 28.2            | 0.37            | 6.41                | 116/157           | 2                  | 35.9            | 0.50            | 5.47                | 89/157            |
| T0995o | 8 × 330                  | Easy                    | 18.9            | 0.36            | 4.78                | 84/147            | 2                  | 18.1            | 0.35            | 5.27                | 80/147            |
| T0997o | 2 × 228                  | Medium                  | 0.0             | 0.00            | 32.59               | 97/163            | 2                  | 26.3            | 0.24            | 14.46               | 1/163             |
| T1003o | 2 × 474                  | Easy                    | 1.2             | 0.30            | 10.75               | 138/164           | 4                  | 61.5            | 0.69            | 5.27                | 73/164            |
| T1006o | 2 × 79                   | Easy                    | 0.0             | 0.00            | 19.03               | 169/189           | 2                  | 28.3            | 0.35            | 2.54                | 110/189           |
| T1009o | 2 × 718                  | Medium                  | 0.0             | 0.10            | 19.01               | 72/166            | 4                  | 4.8             | 0.39            | 9.03                | 12/166            |
| T1020o | 3 × 577                  | Easy                    | 0.0             | 0.12            | 10.23               | 112/144           | 2                  | 0.0             | 0.12            | 9.87                | 108/144           |

<sup>a</sup>Composition of the oligomers;  $m1 \times n1 + m2 \times n2$  indicates that it consists of  $m1$  molecules of monomer 1, each containing  $n1$  residues and  $m2$  molecules of monomer 2, each containing  $n2$  residues. <sup>b</sup>Target difficulties taken from Table S1 of the Supporting Information of ref 35 of the main text (file: prot25795-sup-0005-TableS1.xlsx). <sup>c</sup>Interface Contact Similarity (ICS) quantified as the  $F1$  score,<sup>34</sup> see eq 4 in the main text. <sup>d</sup>Interface Patch Similarity (IPS) quantified as the Jaccard coefficient,<sup>34</sup> see eq 3 in the main text. The corresponding values reported in CASP12 were the Jaccard distances ( $J_D$ ), and were converted to the Jaccard coefficients by using the relationship  $J_C = 1 - J_D$ .<sup>34</sup> <sup>e</sup>Interface residue RMSD, defined as the minimum RMSD of the superposition between target and model chains based on the interacting residues in the target; <sup>f</sup>CASP13 rank of the KIAS-Gdansk model/all models submitted for the respective target; <sup>g</sup>The number of the best of the KIAS-Gdansk models for the respective target.
